# Supplementary material
Source: MDPI journal article supplement (https://www.mdpi.com/2071-1050/11/6/1802)
Supplement: s1 [file s1]

## Supplementary Materials

**Table S1.** Descriptive statistics.

| LOVOS Statements                                                                                                                                   | Mean  | Standard deviation | Coefficient of variation (%) | Median | Skewness | Mode |
|----------------------------------------------------------------------------------------------------------------------------------------------------|-------|--------------------|------------------------------|--------|----------|------|
| <i>Ethical values</i>                                                                                                                              |       |                    |                              |        |          |      |
| I willingly donate to needy people.                                                                                                                | 3.560 | 1.155              | 32.432                       | 4      | -0.614   | 4    |
| When purchasing I prefer products of small producers.                                                                                              | 3.484 | 1.254              | 35.997                       | 4      | -0.704   | 4    |
| In my purchases I boycott products and brands with unethical production practices.                                                                 | 2.928 | 1.585              | 54.128                       | 3      | -0.218   | 5    |
| I do not buy products from producers who benefit from the exploitation of developing countries.                                                    | 2.310 | 1.435              | 62.103                       | 2      | 0.054    | 3    |
| I readily join “boycott” initiatives (e.g., joining initiatives supporting local farmers and helping humanitarian organizations through shopping). | 2.078 | 1.490              | 71.708                       | 2      | 0.249    | 3    |
| <i>Self-determination</i>                                                                                                                          |       |                    |                              |        |          |      |
| I like to participate in “Do-it-yourself” and “Grow-it-yourself” movements.                                                                        | 2.668 | 1.385              | 51.903                       | 3      | -0.163   | 3    |
| I partly grow my food and I buy the rest from local retailers.                                                                                     | 2.432 | 1.267              | 52.086                       | 2      | 0.293    | 1    |
| If something breaks down, first I try to fix it/get it fixed before buying a new one.                                                              | 4.106 | 0.968              | 23.570                       | 4      | -1.426   | 4    |
| I willingly prepare my own equipment (e.g., clothes, hobby and work tools).                                                                        | 2.194 | 1.140              | 51.947                       | 2      | 0.617    | 1    |
| I try to generate the energy I use from renewable energy sources.                                                                                  | 2.404 | 1.244              | 51.753                       | 2      | 0.145    | 2    |
| I would readily live in a community, where things necessary for life were made by the members of the community together.                           | 2.924 | 1.381              | 47.216                       | 3      | -0.299   | 3    |
| <i>Individualism</i>                                                                                                                               |       |                    |                              |        |          |      |
| Career is important for me.                                                                                                                        | 4.306 | 0.786              | 18.251                       | 4      | -1.568   | 5    |
| I prefer buying branded products.                                                                                                                  | 3.308 | 0.940              | 28.405                       | 3      | -0.446   | 3    |
| I shape my lifestyle according to the latest fashion.                                                                                              | 2.568 | 0.984              | 38.299                       | 3      | 0.050    | 3    |
| I buy products that reflect my personality.                                                                                                        | 4.034 | 0.922              | 22.862                       | 4      | -1.083   | 4    |

| <i>Personal growth</i>                                                                                      |       |       |        |   |        |   |
|-------------------------------------------------------------------------------------------------------------|-------|-------|--------|---|--------|---|
| Spiritual values and religion are more important for me than possessing material goods.                     | 2.628 | 1.335 | 50.784 | 3 | 0.140  | 3 |
| In my decisions I try to keep in mind the interests of the community.                                       | 3.414 | 1.002 | 29.359 | 4 | -0.578 | 4 |
| I regularly use sharing based consumption (barter/exchange/sharing).                                        | 2.326 | 1.268 | 54.499 | 2 | 0.080  | 3 |
| It is important for me to reflect a unity with those who are closest to me (e.g., family).                  | 4.310 | 0.949 | 22.008 | 5 | -1.786 | 5 |
| In my daily life I spend time to develop myself.                                                            | 3.804 | 0.973 | 25.588 | 4 | -0.790 | 4 |
| I actively take part in local initiatives.                                                                  | 2.056 | 1.168 | 56.796 | 2 | 0.732  | 1 |
| <i>Material simplicity</i>                                                                                  |       |       |        |   |        |   |
| I consciously try to reduce my consumption when purchasing.                                                 | 3.404 | 1.091 | 32.062 | 3 | -0.686 | 3 |
| I only buy products that I need.                                                                            | 3.520 | 0.988 | 28.060 | 4 | -0.450 | 4 |
| Before purchasing I prepare a list of the products I would like to buy.                                     | 3.056 | 1.501 | 49.121 | 3 | -0.149 | 4 |
| When I give a gift, I prefer gifts made by myself.                                                          | 2.858 | 1.298 | 45.422 | 3 | -0.033 | 3 |
| When I buy durable goods, the primary factor is quality, for which I am even willing to pay a higher price. | 4.330 | 0.880 | 20.327 | 4 | -2.147 | 5 |
| When purchasing I am influenced more by usefulness than by current fashion.                                 | 3.862 | 0.990 | 25.645 | 4 | -0.926 | 4 |
| Dependence on material goods leads to unhappiness.                                                          | 3.478 | 1.222 | 35.126 | 4 | -0.796 | 3 |
| If I have the opportunity, I prefer hiring or borrowing something to buying it myself.                      | 2.582 | 1.209 | 46.832 | 3 | 0.189  | 2 |
| If I notice something in the shop I really like, I usually buy it.                                          | 2.636 | 0.976 | 37.042 | 3 | 0.159  | 3 |
| <i>Ecological awareness</i>                                                                                 |       |       |        |   |        |   |
| When buying a car, minimizing its polluting emissions is an important factor.                               | 3.214 | 1.263 | 39.300 | 3 | -0.738 | 3 |
| It is important that the packaging of the product bought is renewable.                                      | 3.074 | 1.213 | 39.461 | 3 | -0.169 | 3 |
| I strive to buy organic, local, and green products.                                                         | 3.076 | 1.238 | 40.256 | 3 | -0.170 | 3 |
| Consuming too much meat is harmful, not only to health but also to the environment.                         | 2.556 | 1.394 | 54.532 | 2 | 0.149  | 2 |
| The survival of the beauty and integrity of nature is important for me.                                     | 4.342 | 0.821 | 18.913 | 5 | -1.120 | 5 |
| I collect waste separately in order to protect my environment.                                              | 3.778 | 1.242 | 32.888 | 4 | -0.800 | 5 |

**Table S2.** Indicators of validity.

|                             | CFI   | GFI   | AGFI  | NFI   | RMSEA | TLI   | SRMR  | RMR   |
|-----------------------------|-------|-------|-------|-------|-------|-------|-------|-------|
| <b>Acceptance range [1]</b> | ≥0.95 | ≥0.95 | ≥0.95 | ≥0.95 | ≤0.06 | ≥0.95 | ≤0.09 | low   |
| <b>Individualist</b>        | 0.999 | 0.999 | 0.999 | 0.999 | 0.001 | 1.000 | 0.001 | 0.001 |
| <b>Material simplicity</b>  | 0.979 | 0.987 | 0.973 | 0.931 | 0.028 | 0.964 | 0.030 | 0.042 |
| <b>Self-determination</b>   | 0.994 | 0.993 | 0.982 | 0.978 | 0.027 | 0.989 | 0.023 | 0.033 |
| <b>Ecological awareness</b> | 0.999 | 0.994 | 0.985 | 0.986 | 0.011 | 0.998 | 0.021 | 0.030 |
| <b>Personal growth</b>      | 0.997 | 0.994 | 0.985 | 0.972 | 0.016 | 0.994 | 0.023 | 0.026 |
| <b>Ethical values</b>       | 0.999 | 0.997 | 0.987 | 0.991 | 0.012 | 0.998 | 0.018 | 0.029 |

Notes: CFI: comparative fit index; GFI: goodness-of-fit index; AGFI: adjusted goodness-of-fit index; NFI: normed fit index; RMSEA: root mean square error of approximation; TLI: Tucker–Lewis Index; SRMR: square root mean square residual; RMR: root mean square residual

**Table S3.** Reliability and discriminant validity.

|                             | Composite Reliability | Average Variance Extracted | Highest R <sup>2</sup> |
|-----------------------------|-----------------------|----------------------------|------------------------|
| <b>Individualist</b>        | 0.7554                | 0.7909                     | 0.2739                 |
| <b>Material simplicity</b>  | 0.7408                | 0.6007                     | 0.5276                 |
| <b>Self-determination</b>   | 0.7817                | 0.9002                     | 0.5487                 |
| <b>Ecological awareness</b> | 0.8186                | 1.1823                     | 0.5721                 |
| <b>Personal growth</b>      | 0.7257                | 0.6165                     | 0.5082                 |
| <b>Ethical values</b>       | 0.7794                | 1.1460                     | 0.5721                 |

## References

1. Hooper, D.; Coughlan, J.; Mullen, M. Structural Equation Modelling: Guidelines for Determining Model Fit. *Electron. J. Bus. Res. Methods* **2008**, *6*, 53–60.
